# Supplementary material for: Bamboo Knowledge, Ritual Regulation, and Biocultural Resilience: Technical Practices and Symbolic Meanings among the Ngadha of Flores, Indonesia
Source: Research Square preprint supplement (doi:10.21203/rs.3.rs-7756465/v1), 2025-12-05
Supplement: Supplementary file 1 [file 2bfa61871d78d31d150d1ffd.docx]

Additional file 2. Complete inventory of bamboo utilization.

| **No** | **Category** | **Local name** | **Indonesian name** | **English name** | **Function** | **Local bamboo name** | **Indonesian bamboo name** | **Scientific name** | **Bamboo part used** |
| --- | --- | --- | --- | --- | --- | --- | --- | --- | --- |
| 1 | Construction | *tubo* | tiang | pole | main structural house post | *bhêto* | betung | *Dendrocalamus asper* | Base to middle |
| 2 | Construction | *lenga* | atap | roof | house roofing | *bhêto* | betung | *D. asper* | Middle |
| 3 | Construction | *naja* | dinding | wall panels | house walls and floors | *bhêto / peri* | betung / ater | *D. asper* / *G. ater* | Middle to tip |
| 4 | Construction | *lat* | sabuk | binding strap | binding walls and posts | *bhêto* | betung | *D. asper* | Middle to tip |
| 5 | Games | *sagu alu* | – | – | bamboo jumping dance | *peri* | ater | *G. ater* | Tip |
| 6 | Games | *nobe* | lembing | spear | spear-throwing game | *ila* | ampel | *B. vulgaris* | Base to tip |
| 7 | Games | *tempuling* | tombak (dgn besi) | spear with metal tip | spear-throwing game | *bhêto* | betung | *D. asper* | Base to tip |
| 8 | Games | *lengitana* | meriam bambu | bamboo cannon | new year firework | *bhêto* | betung | *D. asper* | Base to middle |
| 9 | Games | *topo* | parang bambu | bamboo machete | martial arts play | *bhêto* | betung | *D. asper* | Base to middle |
| 10 | Games | *bêdi* | pletokan | toy gun | toy gun | *bhêto* | betung | *D. asper* | Branch |
| 11 | Agriculture | *gheke* | ani-ani | rice sickle | harvesting rice | *bhêto* | betung | *D. asper* | Middle |
| 12 | Agriculture | *su’a bhêto* | alat pembersih | weeder | weeding in fields | *bhêto* | betung | *D. asper* | Base |
| 13 | Agriculture | *zo’a* | penugal | dibble stick | planting rice | *bhêto* | betung | *D. asper* | Tip |
| 14 | Agriculture | *ebha* | pengipas padi | winnowing fan | separating grain | *bhêto* | betung | *D. asper* | Sheath |
| 15 | Agriculture | *pepa* | pengusir burung | bird scarer | scarecrow | *bhêto* | betung | *D. asper* | Middle |
| 16 | Agriculture | *dhoka/udo* | pondok ladang | temporary hut | storing harvest | *bhêto* | betung | *D. asper* | Middle to tip |
| 17 | Kitchen | *maki po’o* | wadah lemang | lemang container | cooking sticky rice | *bhêto / peri* | betung / ater | *D. asper* / *G. ater* | Tip / middle |
| 18 | Kitchen | *rodho* | kukusan | steamer | steaming food | *bhêto / peri* | betung / ater | *D. asper* / *G. ater* | Outer layer |
| 19 | Kitchen | *sege/lida* | tampah rapat | woven tray | separating rice | *bhêto* | betung | *D. asper* | Outer layer |
| 20 | Kitchen | *zezo* | tampah longgar | sifter | sifting corn | *bhêto* | betung | *D. asper* | Outer layer |
| 21 | Household | *fego* | sendok nasi | rice paddle | stirring rice | *bhêto* | betung | *D. asper* | Middle |
| 22 | Household | *zoi ngi’i* | tusuk gigi | toothpick | cleaning teeth | *bhêto* | betung | *D. asper* | Middle |
| 23 | Household | *kodo manu* | keranjang ayam | chicken basket | carrying live chicken | *bhêto* | betung | *D. asper* | Outer layer |
| 24 | Household | *tuku hui* | – | – | storing pork | *bhêto* | betung | *D. asper* | Middle |
| 25 | Household | *rana* | bakul besar | large basket | holding meat/rice | *bhêto* | betung | *D. asper* | Outer layer |
| 26 | Household | *tobho ranga* | wadah pakan | feed container | feeding pigs | *bhêto* | betung | *D. asper* | Middle |
| 27 | Household | *tuku koro* | wadah cabai | chili container | storing chili | *bhêto* | betung | *D. asper* | Base/middle |
| 28 | Household | *tuku si’e* | wadah garam | salt container | storing salt | *bhêto* | betung | *D. asper* | Base/middle |
| 29 | Household | *tuku leko* | wadah padi | grain container | storing rice/corn | *bhêto* | betung | *D. asper* | Middle/tip |
| 30 | Household | *toke/bêla wae* | wadah air | water container | storing water | *bhêto* | betung | *D. asper* | Tip |
| 31 | Household | *lêga guru* | tas anyaman | woven bag | carrying provisions | *peri* | ater | *B. vulgaris* | Outer layer |
| 32 | Household | *kêpen/kêpe* | tas kecil | small woven bag | carrying money | *peri* | ater / ampel | *G. ater* / *B. vulgaris* | Outer layer |
| 33 | Hunting | *laja ngêta* | tombak | spear | hunting wild animals | *bhêto / peri* | betung / ater | *D. asper* / *G. ater* / *B. vulgaris* | Tip/middle |
| 34 | Hunting | *le’e* | busur | bow | hunting & combat | *bhêto* | betung | *D. asper* | Tip |
| 35 | Hunting | *ana le’e* | anak panah | arrow | hunting & combat | *bhêto* | betung | *D. asper* | Tip |
| 36 | Hunting | *wo’o* | obor | torch | night hunting | *bhêto / peri* | betung / ater | *D. asper* / *G. ater* | Tip/middle |
| 37 | Hunting | *fau/eto* | gagang pancing | fishing rod handle | fishing | *bhêto* | betung | *D. asper* | Branch |
| 38 | Hunting | *ghate* | jerat babi | animal snare | trapping pigs/deer | *bhêto* | betung | *D. asper* | Middle |
| 39 | Hunting | *bhedhi* | jerat burung | bird snare | trapping quail | *bhêto* | betung | *D. asper* | Branch |
| 40 | Hunting | *zupi* | sumpit | blowpipe | hunting | *ila* | ampel | *B. vulgaris* | Branch |
| 41 | Hunting | *gala* | tombak logam | spear with iron tip | hunting | *bhêto* | betung | *D. asper* | Middle |
| 42 | Hunting | *bhoru* | tombak bambu | bamboo spear | hunting | *bhêto* | betung | *D. asper* | Middle |
| 43 | Protective fencing | *sosa* | perangkap | hedge trap | trapping porcupine/prawn | *bhêto* | betung | *D. asper* | Outer layer |
| 44 | Protective fencing | *hala/sala* | pagar horisontal | fence | pig pens & gardens | *bhêto* | betung | *D. asper* | Middle/tip |
| 45 | Protective fencing | *subi* | pagar ayam | chicken fence | enclosing poultry | *bhêto* | betung | *D. asper* | Middle/tip |
| 46 | Protective fencing | *folo* | pagar rumah | house fence | fencing houses | *bhêto* | betung | *D. asper* | Middle |
| 47 | Ritual | *tibo* | alat ritual | ritual tool | divination | *bhêto* | betung | *D. asper* | Middle |
| 48 | Music | *foy doa* | suling ganda | double flute | ceremonial music | *ila* | ampel | *B. vulgaris* | Middle |
| 49 | Music | *tobho* | – | – | ceremonial music | *bhêto* | betung | *D. asper* | Middle |
| 50 | Music | *sowito* | – | – | ceremonial music | *bhêto* | betung | *D. asper* | Middle |
| 51 | Music | *foy pay* | – | – | ceremonial music | *ila* | ampel | *B. vulgaris* | Middle |
| 52 | Music | *laba dera* | gendang | drum | ceremonial drum | *bhêto* | betung | *D. asper* | Middle |
| 53 | Music | *laba toka* | gendang besar | long drum | ceremonial drum | *bhêto* | betung | *D. asper* | Middle |
| 54 | Music | *teko reko* | – | – | ceremonial music | *bhêto* | betung | *D. asper* | Middle |

Inventory based on field data (2018–2021). Species identification cross-checked with local taxonomies and standard bamboo nomenclature.
