# Supplementary material for: Bamboo Knowledge, Ritual Regulation, and Biocultural Resilience: Technical Practices and Symbolic Meanings among the Ngadha of Flores, Indonesia
Source: Research Square preprint supplement (doi:10.21203/rs.3.rs-7756465/v1), 2025-12-05
Supplement: Supplementary file 2 [file e05861c8bd4201bbded6162c.docx]

Additional file 1. Extended corpus of Ngadha bamboo proverbs.

| **Theme** | **Proverb (Ngadha)** | **Literal Translation** | **Interpretation** | **Context of Use** |
| --- | --- | --- | --- | --- |
| Resilience | Le mêku dêgo moe took bhêto, le zoe zaghu mae took guru | Be like bamboo: wise and firm even if storms strike | Toughness and wisdom in facing hardship | Elders’ advice to youth |
| Resilience | Bhêto toko wolo, go ura da malo bholo | Bamboo grows on hillsides, small yet strong | Humans must endure despite adversity | Common metaphor in daily life |
| Resilience | Moe sa’a bhêto ngia lêbê | Like carrying bamboo while climbing | Difficult tasks require patience | Teaching perseverance |
| Resilience | Moe bhêto dhiri ngaba | Like bamboo on a cliff edge | Life is always in danger; need resilience | Warning about fragility of life |
| Secrecy | Moe wae satu bhêto | Water inside bamboo | Hidden thoughts; discretion | Guidance for careful speech |
| Secrecy | Moe sobe sêsi bha’i | Bamboo water without a stopper | Indiscretion, careless words | Criticism of gossipers |
| Secrecy | Moe tuku sêbhe duki | Bamboo tightly closed | Keeping secrets | Social advice |
| Secrecy | Moe wae one bhêto | Like water in bamboo | Reserved, hard to read | Description of introverted person |
| Honesty | Moe bhêto rogho olo, bei wara langa | Bamboo scratches others but ignores itself | Hypocrisy; need for self-reflection | Criticism of unfair judgment |
| Honesty | Bhêto alu modhe hiwu soe tau sobe | Good bamboo is chosen as water container | Honesty, sincerity earn respect | Ethical teaching |
| Leadership | Bhêto tolo woso, ladho dhomi se take | One clump shelters many people | Leader must protect the community | Leadership metaphor |
| Leadership | Bhêto ladho toko tau fao mala wolo | A bamboo clump shades the entire hillside | Collective protection under just leadership | Political-ethical guidance |
| Leadership | Bhêto fao kapa, pale dhugu dhaga | Dense bamboo falls across each other | Wealth attracts dependents/friends | Social critique |
| Social order | Ge nua ne’e fa;o bhêto ngata | Each village has a bamboo grove | Each community has its own laws | Recognition of adat jurisdiction |
| Social order | Moe go naja da shogo, lêdha da dadhu | Problems arise from family disputes | Household harmony as basis of order | Family ethics |
| Inheritance/kinship | Moe foka duku rapu | Each bamboo shoot follows the clump | Children inherit parents’ traits | Intergenerational teaching |
| Inheritance/kinship | Bhêto bêlo rapu, pri belo ili | Each bamboo clump has its own character | Every family/group is unique | Teaching social diversity |
| Fertility | Moe bhêto ili tiki | Bamboo growing sadly | Infertility, threatened lineage | Reproductive metaphor |
| Futility | Moe saro da ghoro olo lobo | Futile effort like pulling bamboo from shoots | Pointless struggle | Warning against wasted effort |
| Futility | Moe bhêto ponga pali | Hollow bamboo without nodes | Spies exploit both sides | Critique of betrayal |
| Futility | Moe li rongu | Bamboo sounds loud | Arrogant talk without substance | Social critique of arrogance |

All proverbs recorded during fieldwork (2018–2021). Translations and interpretations by the author.
